# Supplementary material for: NMDA Receptor Antagonists Degrade Lipofuscin via Autophagy in Human Retinal Pigment Epithelial Cells
Source: MDPI journal article supplement (doi:10.3390/medicina58081129), 2022-08-20
Supplement: s1 [file s1]

## Supplementary Figure

### Figure S1

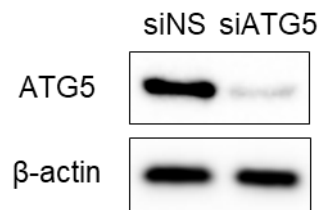

**Supplementary Figure S1.** Reduction in the level of endogenous ATG5 by siRNA. ARPE-19 cells were transiently transfected with siRNAs targeting *ATG5* mRNA (siATG5) or non-specific siRNA (siNS) for 72 h. Endogenous ATG5 protein levels in ARPE-19 cells were measured by western blotting.
